# Supplementary material for: Wildlife as Food and Medicine in Brazil: A Neglected Zoonotic Risk?
Source: MDPI journal article supplement (doi:10.3390/pathogens13030222), 2024-03-02
Supplement: s1 [file s1]

**Table S1.** List of animal species consumed in Brazil, classified by major taxonomic groups, as observed in literature. Species names are as reported in the references. Species in bold lettering are domestic/introduced species. Species without an assigned usage in the table either have no clear usage expressed in their publication of origin, or are reported to be bred/kept in captivity.

| Clade | Order            | Species                           | Medicine | Food | Type of product       | References                            |
|-------|------------------|-----------------------------------|----------|------|-----------------------|---------------------------------------|
| Aves  | Accipitriformes  | <i>Buteo brachyurus</i>           |          | X    |                       | [12]                                  |
|       |                  | <i>Buteo nitidus</i>              |          | X    |                       | [12]                                  |
|       |                  | <i>Buteogallus urubitinga</i>     | X        |      | Bones                 | [38]                                  |
|       |                  | <i>Geranoaetus melanoleucus</i>   |          | X    |                       | [12]                                  |
|       |                  | <i>Heterospizias meridionalis</i> |          | X    |                       | [12]                                  |
|       |                  | <i>Rupornis magnirostris</i>      |          | X    |                       | [12,22]                               |
|       | Anseriformes     | <b><i>Anas platyrhynchos</i></b>  | X        |      | whole animal, eggs    | [38,75,29,36]                         |
|       |                  | <i>Anhima cornuta</i>             | X        |      |                       | [21]                                  |
|       |                  | <i>Anser anser</i>                | X        | X    |                       | [21,10]                               |
|       |                  | <i>Dendrocygna viduata</i>        |          | X    |                       | [12]                                  |
|       |                  | <i>Netta erythrophthalma</i>      | X        |      | Eggs                  | [38]                                  |
|       |                  | <i>Sarkidiornis sylvicola</i>     | X        | X    | Caruncle              | [12,13]                               |
|       | Apodiformes      | "Hummingbird"                     | X        |      | Whole animal, nest    | [75]                                  |
|       |                  | <i>Amazilia fimbriata</i>         |          | X    |                       | [22]                                  |
|       |                  | <i>Anopetia gounellei</i>         |          | X    |                       | [22]                                  |
|       |                  | <i>Chlorostilbon lucidus</i>      | X        |      | Nest                  | [13]                                  |
|       |                  | <i>Eupetomena macroura</i>        | X        | X    |                       | [22,21]                               |
|       |                  | <i>Phaethornis pretrei</i>        |          | X    |                       | [22]                                  |
|       |                  | <i>Thalurania watertonii</i>      |          | X    |                       | [22]                                  |
|       | Caprimulgiformes | <i>Chordeiles acutipennis</i>     |          | X    |                       | [12]                                  |
|       |                  | <i>Hydropsalis albicollis</i>     |          | X    |                       | [22]                                  |
|       |                  | <i>Nyctidromus albicollis</i>     | X        |      |                       | [21]                                  |
|       | Nyctiibiformes   | <i>Nyctibius griseus</i>          | X        |      |                       | [12,22]                               |
|       | Cariamiformes    | <i>Cariama cristata</i>           | X        | X    | Feathers, fat         | [12,22,76,24]                         |
|       | Cathartiformes   | <i>Cathartes aura</i>             |          |      |                       | [12]                                  |
|       |                  | <i>Coragyps atratus</i>           | X        |      | Liver, feathers, beak | [12,38,75,29,21,76,24,49,18,40,41,31] |
|       | Charadriiformes  | <i>Jacana jacana</i>              |          | X    |                       | [12]                                  |
|       |                  | <i>Vanellus chilensis</i>         | X        | X    |                       | [12,21]                               |

|               |                                   |   |   |                                               |                                                |
|---------------|-----------------------------------|---|---|-----------------------------------------------|------------------------------------------------|
| Ciconiiformes | <i>Ciconia maguari</i>            | X | X |                                               | [21,10]                                        |
| Columbiformes | <i>Claravis pretiosa</i>          |   | X |                                               | [12,22]                                        |
|               | <b><i>Columba livia</i></b>       | X | X | Meat                                          | [38,21,10]                                     |
|               | <i>Columbina minuta</i>           | X | X | Feet, feces, meat                             | [12,22,13,76]                                  |
|               | <i>Columbina picazuro</i>         | X |   | Whole animal                                  | [38]                                           |
|               | <i>Columbina picui</i>            | X | X | Feet, feces, meat                             | [12,22,13,76]                                  |
|               | <i>Columbina squammata</i>        | X | X | Feet, feces, meat                             | [12,22,13]                                     |
|               | <i>Columbina talpacoti</i>        | X | X | Feet, feces, meat                             | [12,22,13,76]                                  |
|               | <i>Leptotila rufaxilla</i>        | X | X | Meat, gizzard, membrane, whole animal         | [38,21,10,13]                                  |
|               | <i>Leptotila verreauxi</i>        | X | X | Meat                                          | [12,22,76]                                     |
|               | <i>Patagioenas picaruzo</i>       |   | X |                                               | [12]                                           |
|               | <i>Zenaida auriculata</i>         |   | X |                                               | [12]                                           |
| Coraciiformes | <i>Chloroceryle amazona</i>       |   |   |                                               | [12]                                           |
| Cuculiformes  | <i>Coccyzus melacoryphus</i>      |   |   |                                               | [12]                                           |
|               | <i>Crotophaga ani</i>             | X | X | Feathers, whole animal, meat, flesh           | [12,22,21,13,24,18,31]                         |
|               | <i>Guira guira</i>                | X | X |                                               | [12,22,21]                                     |
|               | <i>Piaya cayana</i>               |   | X |                                               | [22]                                           |
|               | <i>Tapera naevia</i>              |   | X |                                               | [22]                                           |
| Falconiformes | <i>Caracara plancus</i>           | X | X |                                               | [12]                                           |
|               | <i>Falco ruficularis</i>          | X |   |                                               | [21]                                           |
|               | <i>Falco femoralis</i>            |   |   |                                               | [22]                                           |
|               | <i>Herpetotheres cachinnans</i>   | X |   | Whole animal                                  | [12,38,21]                                     |
| Galbuliformes | <i>Galbula ruficauda</i>          |   | X |                                               | [22]                                           |
|               | <i>Nystalus maculatus</i>         |   | X |                                               | [12]                                           |
| Galliformes   | <b><i>Coturnix coturnix</i></b>   | X |   | Eggs                                          | [38]                                           |
|               | <b><i>Gallus gallus</i></b>       | X |   | Fat, eggs, gizzard, esophagus, meat, feathers | [38,75,29,36,21,24,49,18,40,41,31,77,30,26,37] |
|               | <b><i>Meleagris gallopavo</i></b> | X | X | Feathers, fat                                 | [75,29,21,10,24,49,77]                         |
|               | <b><i>Numida meleagris</i></b>    | X |   | Fat, blood, meat                              | [38,75,29,36,40]                               |
|               | <i>Pauxi tuberosa</i>             | X |   | Beak, gizzard                                 | [26]                                           |
|               | <b><i>Pavo cristatus</i></b>      | X |   | Feathers                                      | [38,75,29,21,40,41,31]                         |

|               |                                  |   |   |                                 |                                    |
|---------------|----------------------------------|---|---|---------------------------------|------------------------------------|
|               | <i>Penelope jacucaca</i>         | X | X | Feathers                        | [21,10,13]                         |
|               | <i>Penelope superciliaris</i>    |   | X |                                 | [22]                               |
| Gruiformes    | <i>Aramides cajaneus</i>         | X | X |                                 | [12,21]                            |
|               | <i>Aramus guarauna</i>           |   | X |                                 | [12]                               |
|               | <i>Gallinula galeata</i>         |   | X |                                 | [12]                               |
|               | <i>Psophia viridis</i>           | X |   | Leg                             | [26]                               |
| Nyctibiformes | <i>Nyctibius griseus</i>         | X |   |                                 | [12,22]                            |
| Passeriformes | <i>Agelaioides fringillarius</i> |   | X |                                 | [12]                               |
|               | <i>Ammodramus humeralis</i>      |   |   |                                 | [12,36]                            |
|               | <i>Chrysomus ruficapillus</i>    |   |   |                                 | [39]                               |
|               | <i>Cnemotriccus fuscatus</i>     |   | X |                                 | [22]                               |
|               | <i>Coereba flaveola</i>          | X | X |                                 | [22,21,39]                         |
|               | <i>Coryphospingus pileatus</i>   |   |   |                                 | [12,39]                            |
|               | <i>Cyanocorax cyanopogon</i>     | X | X | Feathers, whole animal, gizzard | [12,38,22,75,36,21,13,76,24,40,39] |
|               | <i>Cyanoloxia brissonii</i>      |   | X |                                 | [12,22,39]                         |
|               | <i>Dacnis cayana</i>             |   |   |                                 | [22]                               |
|               | <i>Dysithamnus mentalis</i>      |   | X |                                 | [22]                               |
|               | <i>Elaenia chiriquensis</i>      |   | X |                                 | [22]                               |
|               | <i>Elaenia cristata</i>          |   | X |                                 | [22]                               |
|               | <i>Elaenia flavogaster</i>       |   | X |                                 | [22]                               |
|               | <i>Elaenia mesoleuca</i>         |   | X |                                 | [22]                               |
|               | <i>Elaenia parvirostris</i>      |   | X |                                 | [22]                               |
|               | <i>Empidonomus varius</i>        |   | X |                                 | [22]                               |
|               | <i>Estrilda astrild</i>          |   |   |                                 | [39]                               |
|               | <i>Euphonia chlorotica</i>       |   | X |                                 | [12,22,39]                         |
|               | <i>Euscarthmus meloryphus</i>    |   | X |                                 | [22]                               |
|               | <i>Fluvicola nengeta</i>         | X | X | Whole animal                    | [12,38,21]                         |
|               | <i>Formicivora grisea</i>        |   | X |                                 | [22]                               |
|               | <i>Formicivora melanogaster</i>  |   | X |                                 | [22]                               |
|               | <i>Furnarius rufus</i>           | X |   |                                 | [21]                               |
|               | <i>Furnarius leucopus</i>        |   |   |                                 | [12]                               |
|               | <i>Gnorimopsar chopi</i>         |   | X |                                 | [12,39]                            |

|                                        |   |   |              |               |
|----------------------------------------|---|---|--------------|---------------|
| <i>Hemitriccus margarita-ceiventer</i> |   | X |              | [22]          |
| <i>Herpsilochmus atricapillus</i>      |   | X |              | [12,22]       |
| <i>Herpsilochmus longirostris</i>      |   | X |              | [22]          |
| <i>Icterus cayanensis</i>              |   |   |              | [12]          |
| <i>Icterus jamacaii</i>                |   | X |              | [12,22,39]    |
| <i>Icterus pyrrhopterus</i>            |   |   |              | [12,22,39]    |
| <i>Lanio cuculatus</i>                 |   |   |              | [22]          |
| <i>Lanio pileatus</i>                  |   |   |              | [22]          |
| <i>Lathrotriccus euleri</i>            |   | X |              | [22]          |
| <i>Legatus leucophaeus</i>             |   | X |              | [22]          |
| <i>Lepidocolaptes angustirostris</i>   |   | X |              | [22]          |
| <i>Leptopogon amaurocephalus</i>       |   | X |              | [22]          |
| <i>Megarynchus pitangua</i>            |   | X |              | [22]          |
| <i>Mimus saturninus</i>                | X | X | Meat         | [12,22,76,39] |
| <i>Molothrus bonariensis</i>           |   |   |              | [12]          |
| <i>Myiarchus ferox</i>                 |   | X |              | [22]          |
| <i>Myiarchus swainsoni</i>             |   | X |              | [22]          |
| <i>Myiarchus tyrannulus</i>            |   | X |              | [22]          |
| <i>Myiobius atricaudus</i>             |   | X |              | [22]          |
| <i>Myiodynastes maculatus</i>          |   | X |              | [22]          |
| <i>Myiopagis caniceps</i>              |   | X |              | [22]          |
| <i>Myiopagis viridicata</i>            |   | X |              | [22]          |
| <i>Myiophobus fasciatus</i>            |   | X |              | [22]          |
| <i>Myrmorchilus strigilatus</i>        |   | X |              | [22]          |
| <i>Paroaria dominicana</i>             | X | X |              | [12,22,39]    |
| <i>Passer domesticus</i>               |   |   |              | [12]          |
| <i>Phacellodomus rufifrons</i>         |   | X |              | [22]          |
| <i>Pitangus sulphuratus</i>            |   | X |              | [12,22,39]    |
| <i>Polioptila plumbea</i>              |   | X |              | [12,22]       |
| <i>Procacicus solitarius</i>           |   |   |              | [12]          |
| <i>Progne chalybea</i>                 | X |   | Whole animal | [12]          |
| <i>Pseudoseisura cristata</i>          |   |   |              | [12]          |
| <i>Sakesphorus cristatus</i>           |   | X |              | [22]          |

|                |  |                                    |   |            |
|----------------|--|------------------------------------|---|------------|
|                |  | <i>Saltator similis</i>            |   | [39]       |
|                |  | <i>Schistochlamys ruficapillus</i> |   | [22]       |
|                |  | <i>Sclerurus scansor</i>           | X | [22]       |
|                |  | <i>Sicalis flaveola</i>            | X | [12,22,39] |
|                |  | <i>Sicalis luteola</i>             |   | [39]       |
|                |  | <i>Spinus yarrellii</i>            |   | [12,39]    |
|                |  | <i>Sporophila albogularis</i>      | X | [12,22]    |
|                |  | <i>Sporophila angolensis</i>       |   | [12,39]    |
|                |  | <i>Sporophila ardesiaca</i>        |   | [12,39]    |
|                |  | <i>Sporophila bouvreuil</i>        |   | [39]       |
|                |  | <i>Sporophila leucoptera</i>       |   | [12]       |
|                |  | <i>Sporophila lineola</i>          |   | [12,22]    |
|                |  | <i>Sporophila nigricollis</i>      |   | [12,22]    |
|                |  | <i>Sturnella supercilialis</i>     |   | [12]       |
|                |  | <i>Tachyphonus rufus</i>           |   | [12]       |
|                |  | <i>Tangara cayana</i>              | X | [22]       |
|                |  | <i>Tangara palmarum</i>            | X | [22]       |
|                |  | <i>Tangara sayaca</i>              | X | [22]       |
|                |  | <i>Taraba major</i>                | X | [22]       |
|                |  | <i>Thamnophilus capistratus</i>    | X | [12,22]    |
|                |  | <i>Thamnophilus punctatus</i>      | X | [22]       |
|                |  | <i>Thamnophilus torquatus</i>      | X | [22]       |
|                |  | <i>Troglodytes musculus</i>        | X | [12]       |
|                |  | <i>Turdus albicollis</i>           |   | [22]       |
|                |  | <i>Turdus amaurochalinus</i>       |   | [12,22]    |
|                |  | <i>Turdus leucomelas</i>           | X | [12,22]    |
|                |  | <i>Turdus rufiventris</i>          | X | [12,22]    |
|                |  | <i>Tyrannus melancholicus</i>      | X | [22]       |
|                |  | <i>Volatinia jacarina</i>          | X | [12]       |
|                |  | <i>Xolmis dominicanus</i>          |   | [12]       |
|                |  | <i>Zonotrichia capensis</i>        | X | [12,22]    |
| Pelecaniformes |  | <i>Ardea alba</i>                  | X | [12]       |
|                |  | <i>Ardea cocoi</i>                 | X | [21,10]    |

|                  |                                          |   |   |                                |                           |
|------------------|------------------------------------------|---|---|--------------------------------|---------------------------|
|                  | <i>Egretta thula</i>                     |   | X |                                | [12]                      |
|                  | <i>Tigrisoma lineatum</i>                |   | X |                                | [12]                      |
| Piciformes       | "acari"                                  | X |   | Skin                           | [18]                      |
|                  | <i>Celeus flavescens</i>                 |   | X |                                | [22]                      |
|                  | <i>Dryocopus lineatus</i>                | X |   |                                | [21]                      |
|                  | <i>Piculus chrysochloros</i>             |   | X |                                | [22]                      |
|                  | <i>Pteroglossus aracari</i>              | X |   |                                | [21]                      |
|                  | <i>Pteroglossus inscriptus</i>           | X |   |                                | [21]                      |
|                  | <i>Ramphastos tucanus</i>                | X |   | Beak                           | [21,18]                   |
|                  | <i>Ramphastos vitellinus</i>             | X |   |                                | [21]                      |
|                  | <i>Veniliornis passerinus</i>            |   | X |                                | [12,22]                   |
| Podicipediformes | <i>Tachybaptus dominicus</i>             | X |   | Gizzard, membrane              | [13]                      |
| Psittaciformes   | <i>Amazona aestiva</i>                   | X | X | Feces                          | [12,38,22]                |
|                  | <i>Amazona sp.</i>                       | X |   | Feces                          | [49]                      |
|                  | <i>Anodorhynchus hyacinthinus</i>        | X |   | Beak                           | [26]                      |
|                  | <i>Ara araruna</i>                       | X |   | Beak                           | [26]                      |
|                  | <i>Ara chloropterus</i>                  | X |   | Beak                           | [26]                      |
|                  | <i>Ara macao</i>                         | X |   | Beak                           | [26]                      |
|                  | <i>Eupsittula cactorum</i>               | X |   | Meat                           | [76]                      |
|                  | <i>Eupsittula cactorum</i>               |   | X |                                | [12,22]                   |
|                  | <i>Forpus xanthopterygius</i>            |   | X |                                | [12,22]                   |
| Rheiformes       | <b><i>Rhea americana</i></b>             | X | X | Fat, eggs                      | [38,29,21,10,24,18,40]    |
| Strigiformes     | <i>Glaucidium brasilianum</i>            |   |   |                                | [12,22]                   |
|                  | <i>Megascops choliba</i>                 |   |   |                                | [12]                      |
|                  | <i>Rhynchotus rufescens</i>              | X | X |                                | [12,21,10]                |
| Struthioniformes | <i>Struthio camelus</i>                  | X |   | Toasted egg shells             | [75,78]                   |
| Tinamiformes     | <i>Crypturellus noctivagus</i>           | X | X |                                | [22,21,10]                |
|                  | <i>Crypturellus parvirostris</i>         |   | X |                                | [12,22]                   |
|                  | <i>Crypturellus tataupa</i>              | X | X |                                | [12,22]                   |
|                  | <i>Nothura boraquira</i>                 | X | X | Feathers                       | [12,21,10,13,76]          |
|                  | <b><i>Nothura maculosa cearensis</i></b> | X | X | Feathers                       | [22,75,29,13,24,77,30,37] |
|                  | <i>Nothura spp.</i>                      |   | X |                                | [13]                      |
|                  | <i>Tinamus tao</i>                       | X |   | Feet scales, feathers,<br>head | [26]                      |

|                    |               |                                |   |   |                                                    |                                             |
|--------------------|---------------|--------------------------------|---|---|----------------------------------------------------|---------------------------------------------|
| Non-avian Dyapsida | Trogoniformes | <i>Trogon curucui</i>          |   | X |                                                    | [22]                                        |
|                    | Crocodyla     | <i>Crocodylus sp.</i>          | X |   | Skin, bone                                         | [32]                                        |
|                    |               | <i>Caiman crocodilus</i>       | X | X | Skin, teeth, fat                                   | [29,21,10,18,40,31,26,25,33]                |
|                    |               | <i>Caiman latirostris</i>      | X | X | Leather, fat, skin                                 | [75,21,10,24,49,18,40,25,33]                |
|                    |               | <i>Caiman sp.</i>              | X |   | Skin, bone                                         | [32]                                        |
|                    |               | <i>Caiman yacare</i>           | X | X |                                                    | [25]                                        |
|                    |               | <i>Melanosuchus niger</i>      | X | X | Fat, skin, penis                                   | [21,10,18,33]                               |
|                    |               | <i>Paleosuchus palpebrosus</i> | X | X | Leather, fat, penis, tooth                         | [21,10,49,18,40,25,33]                      |
|                    |               | <i>Paleosuchus sp.</i>         | X |   | Skin, bone                                         | [32]                                        |
|                    |               | <i>Paleosuchus trigonatus</i>  | X | X |                                                    | [21,10,25]                                  |
|                    | Squamata      | <i>Ameiva ameiva</i>           | X | X |                                                    | [21,25,33]                                  |
|                    |               | <i>Anolis fuscoauratus</i>     | X |   |                                                    | [33]                                        |
|                    |               | <i>Boa constrictor</i>         | X | X | Fat                                                | [26,21,10,13,49,18,40,25,33]                |
|                    |               | <i>Bothrops erythromelas</i>   | X |   | Whole animal                                       | [13]                                        |
|                    |               | <i>Bothrops leucurus</i>       | X |   |                                                    | [21,33]                                     |
|                    |               | <i>Bothrops sp.</i>            | X |   | Fat, whole animal, powdered product                | [49,18,78,32]                               |
|                    |               | <i>Caudisona durissa</i>       | X | X | Fat                                                | [24,25]                                     |
|                    |               | <i>Chironius sp.</i>           | X |   | Powdered product                                   | [32]                                        |
|                    |               | <i>Cnemidophorus ocellifer</i> | X | X |                                                    | [36,21,25]                                  |
|                    |               | <i>Corallus caninus</i>        | X |   | Whole animal                                       | [36,21,25]                                  |
|                    |               | <i>Corallus hortulanus</i>     | X |   |                                                    | [36,21,25]                                  |
|                    |               | <i>Crotalus durissus</i>       | X | X | Rattle, fat, tooth, skin                           | [38,75,29,36,21,13,40,41,31,77,30,32,25]    |
|                    |               | <i>Dracaena guianensis</i>     |   | X |                                                    | [25]                                        |
|                    |               | <i>Epicrates assisi</i>        | X |   |                                                    | [36,25]                                     |
|                    |               | <i>Epicrates cenchria</i>      | X |   | Fat                                                | [29,21,49,18,25]                            |
|                    |               | <i>Eunectes murinus</i>        | X | X | Fat                                                | [29,21,10,49,18,40,26,25]                   |
|                    |               | <i>Eunectes notaeus</i>        | X | X |                                                    | [25]                                        |
|                    |               | <i>Hemidactylus mabouia</i>    | X |   | Whole animal                                       | [29,36,21,49,18,25]                         |
|                    |               | <i>Iguana iguana</i>           | X | X | Bone, fat, lung, leather, meat, whole animal, tail | [38,75,36,21,10,13,24,40,41,77,30,37,32,25] |

|            |                                  |   |   |                                                |                                                 |
|------------|----------------------------------|---|---|------------------------------------------------|-------------------------------------------------|
|            | <i>Lachesis muta</i>             | X | X | Fat                                            | [21,49,18,25]                                   |
|            | <i>Leptophis ahaetulla</i>       | X |   | Whole animal                                   | [21]                                            |
|            | <i>Liophis sp.</i>               | X |   | Powdered product                               | [32]                                            |
|            | <i>Mastigodryas bifossatus</i>   | X |   |                                                | [21,25]                                         |
|            | <i>Micrurus ibiboboca</i>        | X |   |                                                | [36,21,25]                                      |
|            | <i>Micrurus sp.</i>              | X |   | Fat, whole animal                              | [18]                                            |
|            | <i>Oxyrhopus guibei</i>          | X |   |                                                | [25]                                            |
|            | <i>Oxyrhopus petola</i>          | X |   |                                                | [25]                                            |
|            | <i>Oxyrhopus trigeminus</i>      | X |   | Fat, whole animal                              | [36,21,30,40,25]                                |
|            | <i>Philodryas nattereri</i>      |   |   |                                                | [25]                                            |
|            | <i>Phyllorpezus pollicaris</i>   | X |   |                                                | [36]                                            |
|            | <i>Placosoma sp.</i>             | X |   | Skin                                           | [32]                                            |
|            | <i>Polychrus acutirostris</i>    | X |   |                                                | [36,25]                                         |
|            | <i>Polychrus marmoratus</i>      | X |   |                                                | [21,25]                                         |
|            | <i>Salvator merianae</i>         | X |   | Leather, liver, fat                            | [13]                                            |
|            | <i>Spilotes pullatus</i>         | X |   | Whole animal                                   | [36,21,18,25]                                   |
|            | <i>Tropidurus hispidus</i>       | X |   | Whole animal, bone,<br>leather, liver, viscera | [38,36,21,13,49,18,31,78,25,33]                 |
|            | <i>Tropidurus semitaeniatus</i>  | X |   |                                                | [21,25]                                         |
|            | <i>Tropidurus torquatus</i>      | X |   |                                                | [21,25]                                         |
|            | <i>Tupinambis merianae</i>       | X | X | Fat, meat                                      | [38,29,36,21,10,24,18,41,31,77,30,<br>78,25,33] |
|            | <i>Tupinambis rufescens</i>      | X | X |                                                | [25]                                            |
|            | <i>Tupinambis sp.</i>            | X |   | Fat, tongue, skin                              | [49]                                            |
|            | <i>Tupinambis teguixin</i>       | X | X | Fat, tail                                      | [21,10,18,26,25]                                |
|            | <i>Uranoscodon superciliosus</i> | X |   |                                                | [21,25]                                         |
|            | <i>Xenodon merremii</i>          |   |   |                                                | [25]                                            |
| Testudines | <i>Caretta caretta</i>           | X | X | Fat                                            | [21,10,49,25]                                   |
|            | <i>Chelonia mydas</i>            | X | X | Fat                                            | [21,10,49,25]                                   |
|            | <i>Chelonoidis carbonarius</i>   | X | X | Fat, whole animal                              | [38,36,24,26,25]                                |
|            | <i>Chelonoidis denticulata</i>   | X | X | Carapace, whole animal, fat, liver, urine      | [75,29,40,26,25]                                |
|            | <i>Chelus fimbriatus</i>         | X | X |                                                | [25]                                            |
|            | <i>Dermochelys coriacea</i>      | X | X | Fat, oil from skin                             | [21,10,49,25]                                   |



|          |           |                                   |   |   |                                             |                                             |
|----------|-----------|-----------------------------------|---|---|---------------------------------------------|---------------------------------------------|
|          |           | <i>Eretmochelys imbricata</i>     | X | X | Fat                                         | [21,10,49]                                  |
|          |           | <i>Geochelone carbonaria</i>      | X |   | Carapace, fat, liver, blood                 | [21,49,79]                                  |
|          |           | <i>Geochelone denticulata</i>     | X |   | Carapace, fat, liver                        | [21,79]                                     |
|          |           | <i>Kinosternon scorpioides</i>    | X | X |                                             | [36,25]                                     |
|          |           | <i>Lepidochelys olivacea</i>      | X | X |                                             | [21,10,49,25]                               |
|          |           | <i>Mesoclemmys nasuta</i>         |   | X |                                             | [25]                                        |
|          |           | <i>Mesoclemmys tuberculata</i>    | X | X | Fat, meat, eggs                             | [38,36,21,13,25]                            |
|          |           | <i>Peltocephalus dumerilianus</i> | X | X |                                             | [21,10,25,43]                               |
|          |           | <i>Phrynops geoffroanus</i>       | X | X | Carapace, fat, hoof                         | [75,59,36,21,24,49,18,40,37,25]             |
|          |           | <i>Phrynops spp.</i>              | X |   | Fat                                         | [77]                                        |
|          |           | <i>Phrynops tuberosus</i>         | X | X | Fat, shell, blood, eggs                     | [36,13,49,48,41,31,25]                      |
|          |           | <i>Platemys platycephala</i>      |   | X |                                             | [25]                                        |
|          |           | <i>Podocnemis erythrocephala</i>  | X | X |                                             | [25]                                        |
|          |           | <i>Podocnemis expansa</i>         | X | X | Fat                                         | [21,10,25,79,43]                            |
|          |           | <i>Podocnemis sextuberculata</i>  | X | X |                                             | [21,10,25,43]                               |
|          |           | <i>Podocnemis unifilis</i>        | X | X |                                             | [21,10,25]                                  |
|          |           | <i>Rhinoclemmys punctulata</i>    | X | X |                                             | [21,10,25]                                  |
| Mammalia | Carnivora | <i>Canis lupus familiaris</i>     | X |   | Feces, head                                 | [38,36,21,49]                               |
|          |           | <i>Cerdocyon thous</i>            | X |   | Fat, bone, liver, meat, tail, leather, suet | [38,75,21,13,24,49,18,40,41,31,77,30,37,11] |
|          |           | <i>Chrysocyon brachyurus</i>      | X |   |                                             | [21]                                        |
|          |           | <i>Conepatus amazonicus</i>       | X | X |                                             | [11]                                        |
|          |           | <i>Conepatus semistriatus</i>     | X | X | Bones, fat, meat, tail, scent glands        | [38,75,29,36,21,10,13,24,40]                |
|          |           | <i>Conepatus sp.</i>              | X |   | Bone                                        | [49]                                        |
|          |           | <i>Dusicyon thous</i>             | X |   |                                             | [21]                                        |
|          |           | <i>Eira barbara</i>               | X |   |                                             | [11]                                        |
|          |           | <i>Felis catus</i>                | X |   | Whole animal                                | [38]                                        |
|          |           | <i>Felis silvestris</i>           | X |   | Fur                                         | [31]                                        |
|          |           | <i>Galictis cuja</i>              |   | X |                                             | [11]                                        |
|          |           | <i>Leopardus pardalis</i>         | X |   | Tail, fat                                   | [13,11]                                     |
|          |           | <i>Leopardus tigrinus</i>         | X |   | Meat, tail, fat, leather                    | [13,24,11]                                  |

|                 |                                     |   |   |                                                                     |                                          |
|-----------------|-------------------------------------|---|---|---------------------------------------------------------------------|------------------------------------------|
| Cetartiodactyla | <i>Leopardus wiedii</i>             | X |   |                                                                     | [11]                                     |
|                 | <i>Lontra longicaudis</i>           | X |   |                                                                     | [21,10]                                  |
|                 | <i>Nasua nasua</i>                  | X | X | Penis, fat, bone                                                    | [21,49,18,11]                            |
|                 | <i>Panthera onca</i>                | X |   |                                                                     | [21,26,11]                               |
|                 | <i>Procyon cancrivorus</i>          | X |   | Fat, skin,tail, leather                                             | [21,13,24,49,18,40,31,11]                |
|                 | <i>Puma concolor</i>                | X |   | Fat                                                                 | [21,13,11]                               |
|                 | <i>Puma yagouaroundi</i>            | X |   | Fat, tail, leather                                                  | [13,24,11]                               |
|                 | <i>Speothos venaticus</i>           | X |   |                                                                     | [21]                                     |
|                 | "whale"                             | X |   | Fat                                                                 | [24]                                     |
|                 | <i>Balaenoptera acutorostrata</i>   | X |   | Fat, oil                                                            | [24,49,18]                               |
|                 | <i>Blastocerus dichotomus</i>       | X |   |                                                                     | [21,10]                                  |
|                 | <b><i>Bos taurus</i></b>            | X |   | Bezoar, milk, horn, butter, liver, skull marrow, urine, penis, hoof | [38,75,29,36,21,24,18,40,41,31,77,30,37] |
|                 | <b><i>Bubalus bubalis</i></b>       | X | X | Horn, fat                                                           | [21,10,18]                               |
|                 | <b><i>Capra hircus</i></b>          | X | X | Milk, horn, hair                                                    | [38,21,10,24,18,41,77]                   |
|                 | <i>Inia geoffrensis</i>             | X | X | Fat, oil from skin                                                  | [21,10,49,18]                            |
|                 | <i>Mazama americana</i>             | X | X | Marrow, fat, bowel fat                                              | [21,10,26,11]                            |
|                 | <i>Mazama gouazoubira</i>           | X | X | Horn, fat                                                           | [21,10,24,11]                            |
|                 | <i>Mazama simplicicornis</i>        | X | X |                                                                     | [21,10]                                  |
|                 | <i>Mazama sp.</i>                   | X |   | Horn, hoof, tail, tibia                                             | [18,41]                                  |
|                 | <b><i>Ovis aries</i></b>            | X |   | Fat, castrated ram suet, horn, skull, leather                       | [2,75,29,36,21,24,49,18,40,41,31,77,37]  |
|                 | <i>Ozotoceros bezoarticus</i>       | X | X |                                                                     | [21,10]                                  |
|                 | <i>Pecari tajacu</i>                | X | X | Bowels, testicles, fat                                              | [21,10,26,11]                            |
|                 | <i>Physeter catodon</i>             | X |   | Fat                                                                 | [21,18]                                  |
|                 | <i>Physeter macrocephalus</i>       | X |   | Fat, oil                                                            | [49]                                     |
|                 | <i>Sotalia fluviatilis</i>          | X | X | Fat, oil from skin                                                  | [21,10,49,18]                            |
|                 | <i>Sotalia guianensis</i>           | X | X | Fat, oil from skin                                                  | [21,10,49,18]                            |
|                 | <b><i>Sus scrofa domesticus</i></b> | X |   | Fat, navel, fat from scrotum, testicle                              | [38,21,24,49,18,41,31,77,30,37]          |
|                 | <i>Tayassu pecari</i>               | X | X | Teeth, testicles                                                    | [21,10,26,11]                            |

|                 |                                  |   |   |                                    |                                             |
|-----------------|----------------------------------|---|---|------------------------------------|---------------------------------------------|
|                 | <i>Tayassu tajacu</i>            | X |   | Fat                                | [18]                                        |
| Chiroptera      | <i>Molossus molossus</i>         | X |   | Whole animal                       | [38]                                        |
| Cingulata       | <i>Cabassous tatouay</i>         | X | X |                                    | [11]                                        |
|                 | <i>Dasypus novemcinctus</i>      | X | X | Fat, skin, tail, paws, meat, liver | [38,29,36,21,10,13,24,49,18,41,31,11]       |
|                 | <i>Dasypus septemcinctus</i>     | X | X |                                    | [11]                                        |
|                 | <i>Dasypus sp.</i>               | X |   | Fat, urine, tail, nails            | [26]                                        |
|                 | <i>Euphractus sexcinctus</i>     | X | X | Fat, skin, tail, paws, meat, urine | [75,29,21,10,13,24,49,18,40,51,31,77,30,11] |
|                 | <i>Priodontes maximus</i>        | X | X | Nails, fat, tail                   | [26,11]                                     |
|                 | <i>Tolypeutes sp.</i>            | X |   | Skin, fat, tail                    | [18,32]                                     |
|                 | <i>Tolypeutes tricinctus</i>     | X | X |                                    | [21,10,11]                                  |
| Didelphimorphia | <i>Didelphis marsupialis</i>     | X | X | Fat                                | [21,49,18,11,80]                            |
|                 | <i>Didelphis karkinophaga</i>    | X | X |                                    | [11]                                        |
|                 | <i>Didelphis albiventris</i>     | X | X | Bones, meat, fat                   | [38,29,21,13,49,80]                         |
| Lagomorpha      | <i>Sylvilagus brasiliensis</i>   | X | X | Fur, feces                         | [21,10,49,26,11]                            |
| Perissodactyla  | <i>Equus asinus</i>              | X |   | Milk, hoof, foot-prints            | [38,75,29,21,18,40,41]                      |
|                 | <i>Equus caballus</i>            | X |   | Hair                               | [38,21]                                     |
|                 | <i>Tapirus terrestris</i>        | X | X | Fat, penis, nails                  | [21,10,18,26,11]                            |
| Pilosa          | <i>Bradypus sp.</i>              | X |   | Claw, skin                         | [49]                                        |
|                 | <i>Bradypus tridactylus</i>      | X | X |                                    | [10,18]                                     |
|                 | <i>Bradypus variegatus</i>       | X | X | Claw, skin, bone, fat              | [29,21,10,18,40,11]                         |
|                 | <i>Myrmecophaga tetradactyla</i> | X | X |                                    | [21,10]                                     |
|                 | <i>Myrmecophaga tridactyla</i>   | X | X | Tail hair                          | [21,10,26,11]                               |
|                 | <i>Tamandua tetradactyla</i>     | X | X | Meat, leather, fat, bones, claws   | [13,24,49,11]                               |
| Primate         | <i>Callicebus barbarabrownae</i> |   |   |                                    | [11]                                        |
|                 | <i>Alouatta belzebul</i>         | X | X |                                    | [22,21,10,11]                               |
|                 | <i>Alouatta nigerrima</i>        | X | X |                                    | [22,21,10]                                  |
|                 | <i>Alouatta seniculus</i>        | X | X |                                    | [22,21,10]                                  |
|                 | <i>Callithrix jacchus</i>        | X | X |                                    | [11]                                        |
|                 | <i>Sapajus apella</i>            | X | X | Penis, bone, fat                   | [21,10,18]                                  |
|                 | <i>Sapajus libidinosus</i>       | X | X |                                    | [11]                                        |

|                        |                   |                                     |   |   |                                                                             |                           |
|------------------------|-------------------|-------------------------------------|---|---|-----------------------------------------------------------------------------|---------------------------|
| <b>Amphibia</b>        | Rodentia          | <i>Sapajus libidinosus</i>          | X |   | Meat                                                                        | [13]                      |
|                        |                   | <i>Agouti paca</i>                  | X | X | Fat, bile                                                                   | [21,10,24,18]             |
|                        |                   | <i>Cavia aperea</i>                 | X | X | Fat, teeth, head, whole animal                                              | [38,21,10,24]             |
|                        |                   | <i>Coendou baturitensis</i>         | X | X |                                                                             | [11]                      |
|                        |                   | <i>Coendou prehensilis</i>          | X | X | Spine                                                                       | [75,29,21,10,49,18,40,11] |
|                        |                   | <i>Cuniculus paca</i>               | X | X | Gallbladder, bile                                                           | [13,26,11]                |
|                        |                   | <i>Dasyprocta prymnolopha</i>       | X | X |                                                                             | [21,10,11]                |
|                        |                   | <i>Galea spixii</i>                 | X | X | Meat, teeth, bones                                                          | [13,11]                   |
|                        |                   | <i>Hydrochoerus hydrochaeris</i>    | X | X | Bone, fat, skin, flesh                                                      | [29,36,21,10,18,26,32,11] |
|                        |                   | <i>Kerodon rupestris</i>            | X | X | Fat, manure, coalho (part of stomach), meat, feces, fel, gallbladder, bones | [38,75,36,21,10,13,24,11] |
|                        |                   | <i>Trichomys laurentius</i>         | X |   | Feces                                                                       | [13,11]                   |
|                        |                   | <i>Trichechus inunguis</i>          | X | X | Fat, skin                                                                   | [38,29,21,10,49,18]       |
|                        | Sirenia           | <i>Trichechus manatus</i>           | X | X | Fat, skin, milk                                                             | [36,21,10,49,18,40]       |
|                        | Anura             | "frogs"                             | X |   | Fat                                                                         | [29,18]                   |
|                        |                   | <i>Bufo sp.</i>                     | X |   | Whole animal                                                                | [49,18]                   |
|                        |                   | <i>Chaunus marinus</i>              | X |   |                                                                             | [21]                      |
|                        |                   | <i>Chaunus schneideri</i>           | X |   |                                                                             | [21]                      |
|                        |                   | <i>Leptodactylus labyrinthicus</i>  | X |   | Fat                                                                         | [21,33]                   |
|                        |                   | <i>Leptodactylus sp.</i>            | X |   | Fat                                                                         | [18]                      |
|                        |                   | <i>Leptodactylus vastus</i>         | X |   | Meat, fat                                                                   | [38,13]                   |
|                        |                   | <i>Rhinella jimi</i>                | X |   | Fat, leather, guts, secretions, abdomen                                     | [75,29,36,13,33]          |
|                        |                   | <i>Rhinella marina</i>              | X |   | whole animal (in powder), Abdomen (live animal)                             | [26]                      |
|                        |                   | <i>Rhinella schneideri</i>          | X |   | Viscera, fat                                                                | [24]                      |
|                        |                   | <i>Rhinella sp.</i>                 | X |   | Whole animal                                                                | [32]                      |
|                        |                   | <i>Trachycephalus resinifictrix</i> | X |   | Pitch                                                                       | [26]                      |
| <b>Sharks and Rays</b> | Carchahiniiformes | <i>Carcharhinus leucas</i>          | X |   |                                                                             | [27]                      |
|                        |                   | <i>Carcharhinus limbatus</i>        | X |   | Cartilage, fat                                                              | [21]                      |
|                        |                   | <i>Carcharhinus porosus</i>         | X | X | Cartilage, fat                                                              | [21,10,49,27]             |

|           |                   |                                 |   |   |                                                                 |               |
|-----------|-------------------|---------------------------------|---|---|-----------------------------------------------------------------|---------------|
|           | Myliobatiformes   | <i>Galeocerdo cuvier</i>        | X | X | Cartilage, fat                                                  | [21,10,49,27] |
|           |                   | <i>Rhizoprionodon lalandii</i>  | X | X | Cartilage, oil, fat                                             | [21,10,49,27] |
|           |                   | <i>Rhizoprionodon porosus</i>   | X | X | Cartilage, oil, fat                                             | [21,10,49,27] |
|           |                   | <i>Sphyrna lewini</i>           | X | X | Liver oil, bile                                                 | [21,10,27]    |
|           |                   | <i>Sphyrna sp.</i>              | X |   | Cartilage                                                       | [49,18]       |
|           |                   | "ray fish"                      | X |   | Flesh, tail, fat                                                | [29,79]       |
|           |                   | <i>Aetobatus narinari</i>       | X | X | Tooth, liver oil, tail,<br>mucous from ventral<br>region, liver | [21,10,49,27] |
|           |                   | <i>Dasyatis guttata</i>         | X | X | Tooth, liver oil, tail,<br>mucous from ventral<br>region, liver | [21,10,27]    |
|           |                   | <i>Dasyatis marianae</i>        | X | X | Tooth, liver oil, tail,<br>mucous from ventral<br>region, liver | [21,10,49,27] |
|           |                   | <i>Dasyatis sp.</i>             | X |   | Tail, fat                                                       | [79]          |
|           |                   | <i>Paratrygon aiereba</i>       | X | X |                                                                 | [21,10]       |
|           |                   | <i>Plesiotrygon iwamae</i>      | X | X | Fat                                                             | [21,10,27]    |
|           |                   | <i>Potamotrygon hystrix</i>     | X | X | Spur, fat                                                       | [21,10,27]    |
|           |                   | <i>Potamotrygon motoro</i>      | X | X | Spur, fat                                                       | [21,10,27]    |
|           |                   | <i>Potamotrygon orbignyi</i>    | X | X | Fat                                                             | [21,10,27]    |
|           |                   | <i>Potamotrygon sp.</i>         | X |   | Spur                                                            | [26]          |
|           |                   | <i>Urotrygon microphthalmum</i> | X | X | Tooth, liver oil, tail,<br>mucous from ventral<br>region, liver | [21,10,49,27] |
| Bony fish | Orectolobiformes  | <i>Ginglymostoma cirratum</i>   | X | X | Cartilage, oil                                                  | [21,10,49,27] |
|           | Rajiformes        | <i>Atlantoraja cyclophora</i>   | X | X | Eggs                                                            | [21,10,27]    |
|           | Rhinopristiformes | <i>Pristis pectinata</i>        | X | X | Rostrum                                                         | [21,10,18,27] |
|           |                   | <i>Pristis perotteti</i>        | X | X | Rostrum ("sword")                                               | [21,10,18,27] |
|           | Torpediniformes   | <i>Narcine brasiliensis</i>     | X | X | Fat                                                             | [21,10,27]    |
|           | Anguilliformes    | <i>Gymnothorax funebris</i>     | X | X | Flesh                                                           | [21,10,49,27] |
|           |                   | <i>Gymnothorax moringa</i>      | X | X | Flesh                                                           | [21,10,49,27] |
|           |                   | <i>Gymnothorax vicinus</i>      | X | X | Flesh                                                           | [21,10,49,27] |
|           | Batrachoidiformes | <i>Thalassophryne nattereri</i> | X | X | Flesh, eye, brain                                               | [21,10,49,27] |
|           | Beloniformes      | <i>Exocoetus sp.</i>            | X |   | Fat                                                             | [49]          |

|                   |                                 |   |   |                                                              |                                 |
|-------------------|---------------------------------|---|---|--------------------------------------------------------------|---------------------------------|
| Beryciformes      | <i>Holocentrus adscensionis</i> | X | X | Sting                                                        | [21,10,49,79,27]                |
| Carangiformes     | <i>Echeneis naucrates</i>       | X | X |                                                              | [21,10]                         |
| Characiformes     | <i>Astyanax bimaculatus</i>     | X | X | Whole animal                                                 | [21,10,27]                      |
|                   | <i>Brycon nattereri</i>         | X | X | Meat                                                         | [21,10,27]                      |
|                   | <i>Chalceus macrolepidotus</i>  | X |   | Whole animal, eye                                            | [27]                            |
|                   | <i>Colossoma macropomum</i>     | X | X |                                                              | [21,10]                         |
|                   | <i>Erythrinus erythrinus</i>    | X | X | Whole animal                                                 | [21,10,27]                      |
|                   | <i>Hoplias aimara</i>           | X |   | Fat                                                          | [26]                            |
|                   | <i>Hoplias lacerdae</i>         | X |   | Fat                                                          | [27]                            |
|                   | <i>Hoplias malabaricus</i>      | X | X | Dermal secretion, fat, head, meat, guts, scale, whole animal | [75,29,21,10,24,49,18,41,31,27] |
|                   | <i>Hydrolycus scomberoides</i>  | X | X | Fat                                                          | [21,10,27]                      |
|                   | <i>Leporinus friderici</i>      | X | X |                                                              | [21,10]                         |
|                   | <i>Leporinus piau</i>           | X |   | Fat                                                          | [27]                            |
|                   | <i>Leporinus steindachneri</i>  | X |   | Fat                                                          | [31,27]                         |
|                   | <i>Mylossoma duriventre</i>     | X | X | Fat                                                          | [21,10,27]                      |
|                   | <i>Paracheirodon axelrodi</i>   | X |   | Whole animal                                                 | [27]                            |
|                   | <i>Piaractus brachypomus</i>    | X |   | Fat                                                          | [27]                            |
|                   | <i>Prochilodus argenteus</i>    | X | X |                                                              | [21,10]                         |
|                   | <i>Prochilodus nigricans</i>    | X | X | Fat, gall, meat                                              | [21,10,41,31,27]                |
|                   | <i>Prochilodus spp.</i>         | X |   | Fat                                                          | [24]                            |
|                   | <i>Salminus hilarii</i>         | X |   | Head                                                         | [27]                            |
|                   | <i>Schizodon knerii</i>         | X | X | Fat                                                          | [21,10,27]                      |
|                   | <i>Serrasalmus brandtii</i>     | X | X | Tail, gall, fat                                              | [21,10,27]                      |
| Cichliformes      | <i>Cichla melaniae</i>          | X |   | Caudal fin                                                   | [26]                            |
| Clupeiformes      | <i>Opisthonema oglinum</i>      | X | X | Whole animal                                                 | [21,10,27]                      |
| Elopiformes       | <i>Megalops atlanticus</i>      | X | X | Scale                                                        | [21,10,49,79,27]                |
| Gadiformes        | <i>Gadus morhua</i>             | X | X | Fat, skin                                                    | [38,21,10,27]                   |
| Gymnotiformes     | <i>Electrophorus electricus</i> | X |   | Fat, spine, whole animal, bone                               | [29,21,24,49,40,31,79,27]       |
| Lophiiformes      | <i>Ogcocephalus vespertilio</i> | X |   | Whole animal                                                 | [21,49,27]                      |
| Osteoglossiformes | <i>Arapaima gigas</i>           | X | X | Scale                                                        | [21,10,27]                      |
|                   | <i>Osteoglossum ferreirai</i>   | X |   | Scale                                                        | [27]                            |

|                 |                                      |   |   |              |               |
|-----------------|--------------------------------------|---|---|--------------|---------------|
| Perciformes     | <i>Calamus penna</i>                 | X | X | Fin          | [21,10,27]    |
|                 | <i>Centropomus parallelus</i>        | X | X |              | [21,10]       |
|                 | <i>Centropomus undecimalis</i>       | X | X | Fat          | [21,10,27]    |
|                 | <i>Cynoscion acoupa</i>              | X | X | Otolith      | [21,10,27]    |
|                 | <i>Cynoscion leiarchus</i>           | X | X | Otolith      | [21,10,27]    |
|                 | <i>Micropogonias furnieri</i>        | X | X | Otolith      | [21,10,27]    |
|                 | <i>Pachyurus francisci</i>           | X | X | Otolith      | [21,10,27]    |
|                 | <i>Plagioscion squamosissimus</i>    | X | X | Otolith      | [21,10,27]    |
|                 | <i>Plagioscion surinamensis</i>      | X | X | Otolith      | [21,10,27]    |
|                 | <i>Trichiurus lepturus</i>           | X | X | Tail         | [21,10,27]    |
| Scorpaeniformes | <i>Scorpaena sp.</i>                 | X |   | Flesh        | [49]          |
| Siluriformes    | <i>Aspistor luniscutis</i>           | X |   | Whole animal | [27]          |
|                 | <i>Aspredinichthys tibicen</i>       | X | X | Barbels      | [21,10,49,27] |
|                 | <i>Aspredo aspredo</i>               | X | X | Barbels      | [21,10,49,27] |
|                 | <i>Bagre bagre</i>                   | X | X | Whole animal | [21,10,27]    |
|                 | <i>Brachyplatystoma filamentosum</i> | X |   | Fin          | [27]          |
|                 | <i>Callichthys callichthys</i>       | X | X | Whole animal | [21,10,27]    |
|                 | <i>Cetopsis candiru</i>              | X |   | Meat         | [27]          |
|                 | <i>Franciscodoras marmoratus</i>     | X | X |              | [21,10]       |
|                 | <i>Genidens barbatus</i>             | X | X | Whole animal | [21,10,27]    |
|                 | <i>Genidens genidens</i>             | X | X | Whole animal | [21,10,27]    |
|                 | <i>Lithodoras dorsalis</i>           | X | X | Fat          | [21,10,27]    |
|                 | <i>Megalodoras uranoscopus</i>       | X | X | Fat          | [21,10,27]    |
|                 | <i>Oxydoras niger</i>                | X | X | Fat          | [21,10,27]    |
|                 | <i>Phractocephalus hemioliopus</i>   | X | X | Fat          | [21,10,27]    |
|                 | <i>Pimelodella brasiliensis</i>      | X | X |              | [21,10]       |
|                 | <i>Platyodoras costatus</i>          | X | X |              | [21,10]       |
|                 | <i>Pseudoplatystoma corruscans</i>   | X | X | Fat          | [21,10,27]    |
|                 | <i>Pseudoplatystoma fasciatum</i>    | X | X | Fat, gall    | [21,10,27]    |
|                 | <i>Pterodoras granulosus</i>         | X | X | Fat          | [21,10,27]    |
|                 | <i>Sciadeichthys luniscutis</i>      | X | X |              | [21,10]       |
|                 | <i>Sorubimichthys planiceps</i>      | X | X | Meat         | [21,10,27]    |

|                                 |                                |                                   |                           |              |                                 |                           |            |
|---------------------------------|--------------------------------|-----------------------------------|---------------------------|--------------|---------------------------------|---------------------------|------------|
| Hexapoda                        | Synbranchiformes               | <i>Trachelyopterus galeatus</i>   | X                         | X            | Whole animal, spur              | [21,10,27]                |            |
|                                 |                                | <i>Zungaro zungaro</i>            | X                         |              | Fat, skin, meat                 | [21,27]                   |            |
|                                 |                                | <i>Synbranchus marmoratus</i>     | X                         | X            | Whole animal                    | [21,10,27]                |            |
|                                 |                                | <i>Hippocampus erectus</i>        | X                         |              | Whole animal                    | [21,27]                   |            |
|                                 |                                | <i>Hippocampus reidi</i>          | X                         |              | Whole animal                    | [75,29,21,49,31,79,27]    |            |
|                                 |                                | <i>Balistes capriscus</i>         | X                         | X            | Skin                            | [21,10,27]                |            |
|                                 |                                | <i>Balistes vetula</i>            | X                         | X            | Skin, tooth                     | [21,10,49,18,27]          |            |
|                                 |                                | <i>Colomesus psittacus</i>        | X                         | X            | Liver oil, bile                 | [21,10,49,27]             |            |
|                                 |                                | <i>Sphoeroides testudineus</i>    | X                         | X            | Fat                             | [21,10,27]                |            |
|                                 | Blattodea                      | "termite"                         | x                         |              | Whole animal                    | [41]                      |            |
|                                 |                                | <i>Eurycotis manni</i>            | X                         |              |                                 | [21]                      |            |
|                                 |                                | <i>Microcerotermes exiguus</i>    | X                         |              |                                 | [21]                      |            |
|                                 |                                | <i>Nasutitermes corniger</i>      | X                         |              | Whole animal                    | [24,81]                   |            |
|                                 |                                | <i>Nasutitermes macrocephalus</i> | X                         |              | Whole animal                    | [38,75,29,36,40]          |            |
|                                 |                                | <i>Periplaneta americana</i>      | X                         |              | Whole animal                    | [38,75,29,21,49,40,31,32] |            |
|                                 |                                | Coleoptera                        | "beetle"                  | X            |                                 | Nest                      | [36]       |
|                                 |                                |                                   | <i>Coralimela brunnea</i> | X            |                                 | Whole animal, meat        | [29,21,18] |
|                                 |                                |                                   | Curculionidae             | X            |                                 | Larvae                    | [31]       |
|                                 | <i>Pachymerus nucleorum</i>    |                                   | X                         |              |                                 | [21]                      |            |
| <i>Palembus dermestoides</i>    | X                              |                                   |                           |              | [21]                            |                           |            |
| <i>Rhinostomus barbirostris</i> | X                              |                                   |                           |              | [21]                            |                           |            |
| <i>Rhynchophorus palmarum</i>   | X                              |                                   |                           |              | [21]                            |                           |            |
| Diptera                         | <i>Musca domestica</i>         | X                                 |                           | Whole animal | [75,29,21]                      |                           |            |
| Hemiptera                       | <i>Abedus sp.</i>              | X                                 |                           | Whole animal | [32]                            |                           |            |
|                                 | <i>Belostoma sp.</i>           | X                                 |                           | Whole animal | [32]                            |                           |            |
|                                 | <i>Diplonychus sp.</i>         | X                                 |                           | Whole animal | [32]                            |                           |            |
| Hymenoptera                     | "wasp"                         | X                                 |                           | Whole animal | [18]                            |                           |            |
|                                 | <i>Acromyrmex landolti</i>     | X                                 |                           | Whole animal | [38]                            |                           |            |
|                                 | <i>Apis mellifera</i>          | X                                 |                           | Honey        | [38,75,29,36,21,24,49,18,40,26] |                           |            |
|                                 | <i>Apoica pallens</i>          | X                                 |                           |              | [21]                            |                           |            |
|                                 | <i>Atta cephalotes</i>         | X                                 |                           | Abdomen      | [38,21,49]                      |                           |            |
|                                 | <i>Atta sexdens</i>            | X                                 |                           | Anthill      | [32]                            |                           |            |
|                                 | <i>Brachygastra lecheguana</i> | X                                 |                           |              | [21]                            |                           |            |



|                    |                   |                                  |   |   |                     |                           |
|--------------------|-------------------|----------------------------------|---|---|---------------------|---------------------------|
|                    |                   | <i>Cephalotrigona capitata</i>   | X |   | Honey               | [36,21]                   |
|                    |                   | <i>Frieseomelitta silvestrii</i> | X |   |                     | [21]                      |
|                    |                   | <i>Frieseomelitta varia</i>      | X |   | Honey               | [75,29,79]                |
|                    |                   | <i>Melipona compressipes</i>     | X |   | Honey               | [29,21,49,18]             |
|                    |                   | <i>Melipona mandacaia</i>        | X |   |                     | [21]                      |
|                    |                   | <i>Melipona scutellaris</i>      | X |   | Honey               | [75,29,21,49,18,40,41,31] |
|                    |                   | <i>Melipona sp.</i>              | X |   | Honey               | [29,18]                   |
|                    |                   | <i>Melipona quadrifasciata</i>   | X |   |                     | [21]                      |
|                    |                   | <i>Melipona subnitida</i>        | X |   | Honey               | [75,29,36,21,24,18,41,31] |
|                    |                   | <i>Partamona cupira</i>          | X |   | Honey, bee wax      | [75,29,36,21,41,31]       |
|                    |                   | <i>Partamona seridoensis</i>     | X |   | Honey, "saburá"     | [24]                      |
|                    |                   | <i>Plebeia emerina</i>           | X |   |                     | [21]                      |
|                    |                   | <i>Polistes canadensis</i>       | X |   | Sting               | [21,77]                   |
|                    |                   | <i>Polybia sericea</i>           | X |   |                     | [21]                      |
|                    |                   | <i>Pronectarina sylveirae</i>    | X |   | Nest                | [38]                      |
|                    |                   | <i>Protopolybia exigua</i>       | X |   |                     | [21]                      |
|                    |                   | <i>Scaptotrigona sp.</i>         | X |   | Honey               | [75,29,24,18]             |
|                    |                   | <i>Synoecca surinama</i>         | X |   |                     | [21]                      |
|                    |                   | <i>Tetragonisca angustula</i>    | X |   | Honey               | [75,29,36,21,18]          |
|                    |                   | <i>Trigona mosquito</i>          | X |   |                     | [21]                      |
|                    |                   | <i>Trigona spinipes</i>          | X |   | Honey               | [75,29,21,41]             |
|                    | Lepidoptera       | <i>Oiketicus kirbyi</i>          | X |   |                     | [21]                      |
|                    | Orthoptera        | "cricket"                        | X |   | Leg                 | [31]                      |
|                    |                   | <i>Acheta domesticus</i>         | X |   |                     | [21]                      |
|                    |                   | <i>Gryllus assimilis</i>         | X |   | Leg                 | [41]                      |
| <b>Myriapoda</b>   | Scolopendromorpha | <i>Scolopendra spp.</i>          | X |   | Whole animal        | [49,18]                   |
| <b>Chelicerata</b> | Araneae           | <i>Tarantulas sp.</i>            | X |   | Whole animal        | [18]                      |
|                    | Scorpiones        | <i>Bothriurus asper</i>          | X |   | Sting               | [24]                      |
|                    |                   | <i>Bothriurus sp.</i>            | X |   | Whole animal        | [49]                      |
|                    |                   | <i>Rhopalurus rochai</i>         | X |   | Sting               | [24]                      |
| <b>Crustacea</b>   | Decapoda          | <i>Aratus pisonii</i>            | X | X | whole animal, flesh | [21,10,49]                |
|                    |                   | <i>Calappa ocellata</i>          | X |   |                     | [21]                      |
|                    |                   | <i>Cardisoma guanhumi</i>        | X | X |                     | [21,10,82]                |

|                      |                     |                                   |   |   |                |                           |
|----------------------|---------------------|-----------------------------------|---|---|----------------|---------------------------|
|                      |                     | <i>Emerita portoricensis</i>      | X |   |                | [21]                      |
|                      |                     | <i>Goniopsis cruentata</i>        | X | X | Flesh, bile    | [21,10,49]                |
|                      |                     | <i>Litopenaeus schmitti</i>       | X |   | Fat            | [49]                      |
|                      |                     | <i>Macrobrachium acanthurus</i>   | X | X | Flesh          | [21,10,49]                |
|                      |                     | <i>Macrobrachium borellii</i>     | X | X | Flesh          | [21,10,49]                |
|                      |                     | <i>Macrobrachium carcinus</i>     | X | X |                | [21,10]                   |
|                      |                     | <i>Macrobrachium sp.</i>          | X |   | Spines         | [79]                      |
|                      |                     | <i>Ocypode quadrata</i>           | X |   | Carapace, bile | [21,49]                   |
|                      |                     | <i>Plagusia depressa</i>          | X |   |                | [21]                      |
|                      |                     | <i>Uca maracoani</i>              | X |   | Whole animal   | [21,49]                   |
|                      |                     | <i>Ucides cordatus</i>            | X | X | Bile           | [21,10,49,82]             |
|                      |                     | <i>Xiphopenaeus kroyeri</i>       | X | X |                | [21,10,49]                |
|                      |                     | <i>Xiphopenaeus schmitti</i>      | X | X |                | [10]                      |
|                      | Stomatopoda         | <i>Cloridopsis dubia</i>          | X |   |                | [21]                      |
|                      |                     | <i>Squilla sp.</i>                | X |   | Whole animal   | [49]                      |
| <b>Echinodermata</b> | Clypeasteroida      | <i>Encope sp.</i>                 | X |   | Whole animal   | [49,79]                   |
|                      |                     | <i>Mellita quinquiesperforata</i> | X |   | Whole animal   | [29]                      |
|                      |                     | <i>Mellita sexiesperforata</i>    | X |   |                | [21]                      |
|                      | Paxillosida         | <i>Astropecten sp.</i>            | X |   | Whole animal   | [29,49,79]                |
|                      |                     | <i>Luidia senegalensis</i>        | X |   | Whole animal   | [29,21,79]                |
|                      | Spinulosida         | <i>Echinaster brasiliensis</i>    | X |   | Whole animal   | [29,21]                   |
|                      |                     | <i>Echinaster echinophorus</i>    | X |   | Whole animal   | [29,21]                   |
|                      |                     | <i>Echinaster sp.</i>             | X |   | Whole animal   | [18,40]                   |
|                      | Valvatida           | <i>Oreaster reticulatus</i>       | X |   | Whole animal   | [38,75,29,21,49,18,40,31] |
| <b>Mollusca</b>      | Architaenioglossa** | <i>Pomacea lineata</i>            | X |   |                | [49]                      |
|                      | Littorinimorpha     | <i>Cassis tuberosa</i>            | X |   |                | [21]                      |
|                      |                     | <i>Littorina angulifera</i>       | X |   | Flesh          | [21,49]                   |
|                      |                     | <i>Strombus pugilis</i>           | X |   |                | [21]                      |
|                      | Lucinida            | <i>Phacoides pectinatus</i>       | X |   |                | [21]                      |
|                      | Myida               | <i>Neoteredo reynei</i>           | X |   |                | [21]                      |
|                      |                     | <i>Teredo pedicellata</i>         | X |   |                | [21]                      |
|                      | Myopsida            | <i>Loligo sp.</i>                 | X |   | Shell          | [49]                      |
|                      | Mytilida            | <i>Mytella charruana</i>          | X | X |                | [21,10]                   |
