# Supplementary material for: Wildlife as Food and Medicine in Brazil: A Neglected Zoonotic Risk?
Source: MDPI journal article supplement (doi:10.3390/pathogens13030222), 2024-03-02
Supplement: s1 [file s1]

Table S2: Sources of ethnobiological data explored in the manuscript.

| Reference # | DOI                             | Title                                                                                                                                                        |   | Animals as<br>Medicine | Obs<br>Food                                                                    |
|-------------|---------------------------------|--------------------------------------------------------------------------------------------------------------------------------------------------------------|---|------------------------|--------------------------------------------------------------------------------|
| 33          | 10.1007/s10661-011-2465-0       | A review on human attitudes towards reptiles in Brazil                                                                                                       | X | X                      | Focus on the exploitation and relationship with the taxon. Includes other uses |
| 25          | 10.1186/1746-4269-8-27          | A zoological catalogue of hunted reptiles in the semiarid region of Brazil                                                                                   | X | X                      | Focus on the exploitation of the taxon. Includes other uses                    |
| 31          | 10.1186/1472-6882-9-17          | Animal-based folk remedies sold in public markets in Crato and Juazeiro do Norte, Ceará, Brazil                                                              | X |                        |                                                                                |
| 37          | 10.1590/s0001-37652012005000038 | Animal-based medicines used in ethnoveterinary practices in the semi-arid region of Northeastern Brazil                                                      | X |                        |                                                                                |
|             | 10.1186/1472-6882-8-44          | Animal-based remedies as complementary medicines in Santa Cruz do Capibaribe, Brazil                                                                         | X |                        |                                                                                |
| 38          | 10.1093/ecam/nep134             | Animal-based remedies as complementary medicines in the semi-arid region of northeastern Brazil                                                              | X |                        |                                                                                |
| 20          | 10.1007/s10745-012-9516-1       | Animals for the Gods: Magical and Religious Faunal Use and Trade in Brazil                                                                                   |   |                        | Religious and/or magical only                                                  |
| 30          | 10.1186/1746-4269-5-37          | Animals to heal animals: ethnoveterinary practices in semiarid region, northeastern Brazil                                                                   | X |                        |                                                                                |
|             | 10.1186/1746-4269-9-3           | Birds and people in semiarid northeastern Brazil: symbolic and medicinal relationships                                                                       | X |                        |                                                                                |
| 43          | 10.1186/1746-4269-10-8          | Chain of commercialization of Podocnemis spp. turtles (Testudines: Podocnemididae) in the Purus River, Amazon basin, Brazil: current status and perspectives |   | X                      |                                                                                |
| 29          | 10.1016/j.jep.2009.04.049       | Commercialization of animal-derived remedies as complementary medicine in the semi-arid region of Northeastern Brazil                                        | X |                        |                                                                                |

|    |                              |                                                                                                                       |   |   |  |                                                                               |
|----|------------------------------|-----------------------------------------------------------------------------------------------------------------------|---|---|--|-------------------------------------------------------------------------------|
| 32 | 10.1186/1746-4269-6-29       | Ethnopharmacological survey among migrants living in the Southeast Atlantic Forest of Diadema, São Paulo, Brazil      | X |   |  |                                                                               |
|    | 10.1186/1746-4269-5-1        | Fauna used in popular medicine in Northeast Brazil                                                                    | X |   |  |                                                                               |
| 49 | 10.1016/j.jep.2006.03.007    | From cnidarians to mammals: the use of animals as remedies in fishing communities in NE Brazil                        | X |   |  |                                                                               |
| 11 | 10.15451/ec2016-7-5.5-1-51   | Game mammals of the Caatinga biome                                                                                    | X | X |  | Focus on general exploitation of the taxon. Other non-ingestion uses included |
|    | 10.1186/s13002-017-0174-7    | Habits and customs of crab catchers in southern Bahia, Brazil                                                         |   | X |  | Focus on methods of sourcing                                                  |
| 47 | 10.1186/1746-4269-5-36       | Hunting and use of terrestrial fauna used by Caiçaras from the Atlantic Forest coast (Brazil)                         | X | X |  |                                                                               |
| 46 | 10.1186/1746-4269-5-12       | Hunting strategies used in the semi-arid region of northeastern Brazil                                                |   |   |  | Focus on methods of sourcing                                                  |
| 27 | 10.1155/2012/474716          | Ichthyofauna used in traditional medicine in Brazil                                                                   | X |   |  |                                                                               |
| 39 | 10.1186/s13002-020-00365-5   | Illegal trade of songbirds: an analysis of the activity in an area of northeast Brazil                                |   |   |  | Rearing only                                                                  |
| 50 | 10.1016/j.jnc.2019.02.002    | Keeping reptiles as pets in Brazil: Ethnozoological and conservation aspects                                          |   |   |  | Rearing only                                                                  |
|    | 10.3855/jidc.10177           | Knowledge, practice and perception of human-marsupial interactions in health promotion                                | X | X |  | Focus on the general exploitation of the taxon                                |
| 22 | 10.1186/1746-4269-10-81      | Local knowledge and exploitation of the avian fauna by a rural community in the semi-arid zone of northeastern Brazil | X | X |  | includes pet rearing                                                          |
| 12 | 10.1186/s13002-018-0276-x    | Local knowledge, use, and conservation of wild birds in the semi-arid region of Paraíba state, northeastern Brazil    | X | X |  | Focus on the exploitation of the taxon. Includes rearing                      |
| 23 | 10.1016/j.biocon.2017.06.013 | Market access and wild meat consumption in the central Amazon, Brazil                                                 |   | X |  |                                                                               |

|    |                            |                                                                                                                                                                            |   |   |
|----|----------------------------|----------------------------------------------------------------------------------------------------------------------------------------------------------------------------|---|---|
| 40 | 10.1159/000235855          | Medicinal animals as therapeutic alternative in a semi-arid region of northeastern Brazil                                                                                  | X |   |
| 24 | 10.1186/1746-4269-7-30     | Medicinal animals used in ethnoveterinary practices of the 'Cariri Paraibano', NE Brazil.                                                                                  | X |   |
| 26 | 10.1186/1746-4269-8-37     | Medicinal use of fauna by a traditional community in the Brazilian Amazonia                                                                                                | X |   |
|    | 10.1186/1472-6882-9-35     | Termite usage associated with antibiotic therapy: enhancement of aminoglycoside antibiotic activity by natural products of <i>Nasutitermes corniger</i> (Motschulsky 1855) | X |   |
| 21 | 10.1641/B571107            | The Role of Animal-derived Remedies as Complementary Medicines in Brazil                                                                                                   | X |   |
|    | 10.1186/1746-4269-3-32     | The use of zootherapeutics in folk veterinary medicine in the district of Cubati, Paraíba State, Brazil                                                                    | X |   |
| 19 | 10.1007/s10745-010-9352-0  | Trade of animals used in Brazilian traditional medicine: trends and implications for conservation.                                                                         | X |   |
| 36 | 10.1186/1746-4269-8-41     | Traditional uses of medicinal animals in the semi-arid region of northeastern Brazil                                                                                       | X |   |
| 10 | 10.1155/2013/670352        | Wild animals used as food medicine in Brazil                                                                                                                               | X | X |
| 35 | 10.1007/s10745-019-00107-6 | Wild Meat Trade and Consumption in the Central Amazon, Brazil                                                                                                              |   | X |
|    | 10.1016/j.jep.2006.10.033  | Zootherapeutic practices among fishing communities in North and Northeast Brazil: a comparison                                                                             | X |   |
| 13 | 10.1186/s13002-018-0259-y  | Zootherapeutic uses of wildmeat and associated products in the semiarid region of Brazil: general aspects and challenges for conservation.                                 | X |   |
| 41 | 10.1186/1746-4269-5-21     | Zootherapeutics utilized by residents of the community Poço Dantas, Crato-CE, Brazil                                                                                       | X |   |
| 18 | 10.1016/j.jep.2007.07.015  | Zootherapy goes to town: the use of animal-based remedies in urban areas of NE and N Brazil                                                                                | X |   |

---
